# Supplementary material for: Kinetochore-associated Stu2 promotes chromosome biorientation in vivo
Source: PLoS Genet. 2019 Oct 4;15(10):e1008423. doi: 10.1371/journal.pgen.1008423 (PMC6795502; doi:10.1371/journal.pgen.1008423)
Supplement: S2 Table — (XLSX) [file pgen.1008423.s007.xlsx]

## Sheet: Sheet1
S2 Table. Plasmids and Primers used in this study. All plasmids are derivatives of pSB2232
Plasmid	Primers used to generate plasmids (5' to 3'):
pSB2232 (pSTU2-STU2-3V5, i.e. STU2WT)	SB4372	GATCGATCgggcccTAGTACAATTTCTAATGGGC
	SB4374	GATCGATCctcgagTTATGGATCTGTACTATCCAGTCC
pSB2254 (pSTU2-stu2(∆2-281)-3V5, i.e. stu2TOG1∆)	SB4402	GAGTTTGAAGTTGACTATGgatgagggggaatatcagatag
	SB4413	ggatccactagttctagagc
pSB2255 (pSTU2-stu2(∆2-550)-3V5, i.e. stu2TOG1-2∆)	SB4403	GAGTTTGAAGTTGACTATGaaaaaaattgaagaaacggtcaaaactctacc
	SB4413	ggatccactagttctagagc
pSB2257 (pSTU2-stu2(∆282-550::GDGAGLlinker)-3V5, i.e. stu2TOG2∆)	SB4408	GCCAGGAAAAGAAAGTCCATATTATCGAATggtgatggtgctggtttgAAAAAAATTGAAGAAACGGTCAAAACTCTACC
	SB4413	ggatccactagttctagagc
pSB2259 (pSTU2-stu2(∆551-657::GDGAGLlinker)-3V5, i.e. stu2SK-rich∆)	SB4410	GAGCACTTGGATAATTTGAAAAGGggtgatggtgctggtttgGAAAAGTTGATTGAAGAATACAAGTACAGAC
	SB4413	ggatccactagttctagagc
pSB2261 (pSTU2-stu2(∆658-761::GDGAGLlinker)-3V5, i.e. stu2cc∆)	SB4412	GCTAATAGCACTGACAAGAATggtgatggtgctggtttgAACTTGCAATCGATGGGTACG
	SB4413	ggatccactagttctagagc
pSB2301 (pSTU2-stu2(∆658-761::GDGAGLlinker-GCN4(249-281)bZIP-GDGAGLlinker)-3V5, i.e. stu2cc∆::bZIP) (TRP1 integration plasmid, used as template for construction of pSB2309)	SB4381	AACGCCAAAAAACGTAGTAGCTAATAGCACTGACAAGAATggtgatggtgctggtttgAGAATGAAACAACTTGAAGAC
	SB4382	GTATGGAGTATGATGAAATCGTACCCATCGATTGCAAGTTcaaaccagcaccatcaccGCGTTCGCCAACTAATTTC
pSB2306 (pSTU2-stu2(R200A)-3V5, i.e. stu2R200A)	SB4512	GTCATGGTGATAGAAACGTTgcaTCACAAACGATGAATTTGAT
	SB4457	AATGCCTTCCTAATGGCCTC
pSB2307 (pSTU2-stu2(R519A)-3V5, i.e. stu2R519A)	SB4511	GCAGTCGATGAGCTGTATAC
	SB4513	AAACTCTCAAATCCAATAGTtgcTATAGCAGGTTGGGTGTCGT
pSB2308 (pSTU2-stu2(R200A R519A)-3V5, i.e. stu2R200A R519A)	SB4512	GTCATGGTGATAGAAACGTTgcaTCACAAACGATGAATTTGAT
	SB4513	AAACTCTCAAATCCAATAGTtgcTATAGCAGGTTGGGTGTCGT
pSB2309 (pSTU2-stu2(∆658-761::GDGAGLlinker-GCN4(249-281)bZIP-GDGAGLlinker)-3V5, i.e. stu2cc∆::bZIP)	SB4370	AGTGAACCCAATAGGGTCAG
	SB4371	GTTGACGTCCTCTTTCCTTC
pSB2357 (pSTU2-stu2(∆762-888)-3V5, i.e. stu2C-term∆(762-888))	SB4370	AGTGAACCCAATAGGGTCAG
	SB4572	cctggatccactagttctagagcggccgcTGTATCATTTCTTTTCTTATTTCTATCCAATTC
pSB2358 (pSTU2-stu2(∆855-888)-3V5, i.e. stu2C-term∆(855-888))	SB4370	AGTGAACCCAATAGGGTCAG
	SB4573	cctggatccactagttctagagcggccgcGGCAAAACTATCGTTGAAATCGATATCCAAATC
pSB3103 (pSTU2-stu2(2x basic_∆658-761::GDGAGLlinker)-3V5, i.e. stu22x basic_cc∆)	SB6152 (gBlock)	GCACTTGGATAATTTGAAAAGGAAAAAAATTGAAGAAACGGTCAAAACTCTACCTAATTTCAGTATTaaaAGTGGTAGTACCCATAGCACTATTGAAACGAATAAACAAACTGGGCCAaaaGAGAATAAATTTCTCCTGAAAAAAAGTTCTGTACTTCCCTCCAAGAGAGTGaaaTCTTCACCGCTGAGAAATGATAACAAAAGTAAAGTGAACCCAATAGGGTCAGTAaaaTCCaaaTCAAAACCATCAaaaGTAaaaaaaAACAATAAATCGAGGGTCCTGTTGACGTCTAAGTCTTTGaaaACGCCAAAAAACGTAGTAaaaAATAGCACTGACAAGAATggtgatggtgctggtttgAACTTGCAATCGATGGGTACGATTTCATCATAC
